# Supplementary material for: Biopsy-free circulating tumor DNA assay identifies actionable mutations in lung cancer
Source: PubMed Central journal article supplement (PMC5341844; doi:10.18632/oncotarget.11801), 2016-09-01
Supplement: oncotarget-07-66880-s001.pdf [file oncotarget-07-66880-s001.pdf]

## Biopsy-free circulating tumor DNA assay identifies actionable mutations in lung cancer

### Supplementary Materials

All Exons and partial introns Covered (Copy Number Variations in Bold)

|        |             |              |        |
|--------|-------------|--------------|--------|
| ALK    | APC         | AR           | BRAF   |
| CDKN2A | <b>EGFR</b> | <b>ERBB2</b> | FBXW7  |
| KRAS   | <b>MET</b>  | MYC          | NOTCH1 |
| NRAS   | PIK3CA      | PTEN         | PROC   |
| RB1    | TP53        |              |        |

Partial Coverage ("Hot" Exons):

|         |      |        |        |       |        |
|---------|------|--------|--------|-------|--------|
| ABL1    | AKT1 | ATM    | CDH1   | CSF1R | CTNNB1 |
| ERBB4   | EZH2 | FGFR1  | FGFR2  | FGFR3 | FLT3   |
| GNA11   | GNAQ | GNAS   | HNF1A  | HRAS  | IDH1   |
| IDH2    | JAK2 | JAK3   | KDR    | KIT   | MLH1   |
| MPL     | NPM1 | PDGFRA | PTPN11 | RET   | SMAD4  |
| SMARCB1 | SMO  | SRC    | STK11  | TERT  | VHL    |

**Supplementary Figure S1: Guardant Health 54-gene panel.** One of two ctDNA testing panels utilized for this study. Sixty-nine samples from 68 patients were analyzed. Thirty-eight samples were analyzed using the 54-gene panel and 31 were analyzed using the 68-gene panel.

ALL EXONS AND PARTIAL INTRON COVERAGE

29 GENES  
18 Copy Number  
Variations in Bold

|               |              |              |              |               |
|---------------|--------------|--------------|--------------|---------------|
| APC           | <b>AR</b>    | ARID1A       | <b>BRAF</b>  | BRCA1         |
| BRCA2         | <b>CCND1</b> | <b>CCND2</b> | <b>CCNE1</b> | <b>CDK4</b>   |
| <b>CDK6</b>   | CDKN2A       | CDKN2B       | <b>EGFR</b>  | <b>ERBB2</b>  |
| <b>FGFR1</b>  | <b>FGFR2</b> | HRAS         | <b>KIT</b>   | <b>KRAS</b>   |
| <b>MET</b>    | <b>MYC</b>   | NF1          | NRAS         | <b>PDGFRA</b> |
| <b>PIK3CA</b> | PTEN         | <b>RAF1</b>  | TP53         |               |

EXONS COVERED WITH REPORTED SOMATIC MUTATIONS

38 GENES

|       |       |        |        |       |        |        |
|-------|-------|--------|--------|-------|--------|--------|
| AKT1  | ALK   | ARAF   | ATM    | CDH1  | CTNNB1 | ESR1   |
| EZH2  | FBXW7 | FGFR3  | GATA3  | GNA11 | GNAQ   | GNAS   |
| HNF1A | IDH1  | IDH2   | JAK2   | JAK3  | MAP2K1 | MAP2K2 |
| MLH1  | MPL   | NFE2L2 | NOTCH1 | NPM1  | PTPN11 | RET    |
| RHEB  | RHOA  | RIT1   | ROS1   | SMAD4 | SMO    | SRC    |
| STK11 | TERT* | VHL    |        |       |        |        |

REARRANGEMENTS - EXONS and INTRONS WITH REPORTED BREAKPOINTS

|     |     |      |       |
|-----|-----|------|-------|
| ALK | RET | ROS1 | NTRK1 |
|-----|-----|------|-------|

4 GENES

\*includes promoter region

**Supplementary Figure S2: Guardant Health 68-gene panel.** One of two ctDNA testing panels utilized for this study. Sixty-nine samples from 68 patients were analyzed. Thirty-eight samples were analyzed using the 54-gene panel and 31 were analyzed using the 68-gene panel.

**Supplementary Table S1: Characteristics of the 68 patients including histologic sub-type, stage at initial diagnosis, disease status at blood draw, treatment status and response at blood draw and whether ctDNA alterations were detected.** a = Patient 10 had two blood draws; b = small volume disease at blood draw; c = mucinous tumor; d = lepidic growth pattern; e = isolated leptomeningeal disease. See Supplementary\_Table\_S1
